# Supplementary material
Source: MDPI journal article supplement (https://www.mdpi.com/2077-1312/8/6/412)
Supplement: s1 [file s1]

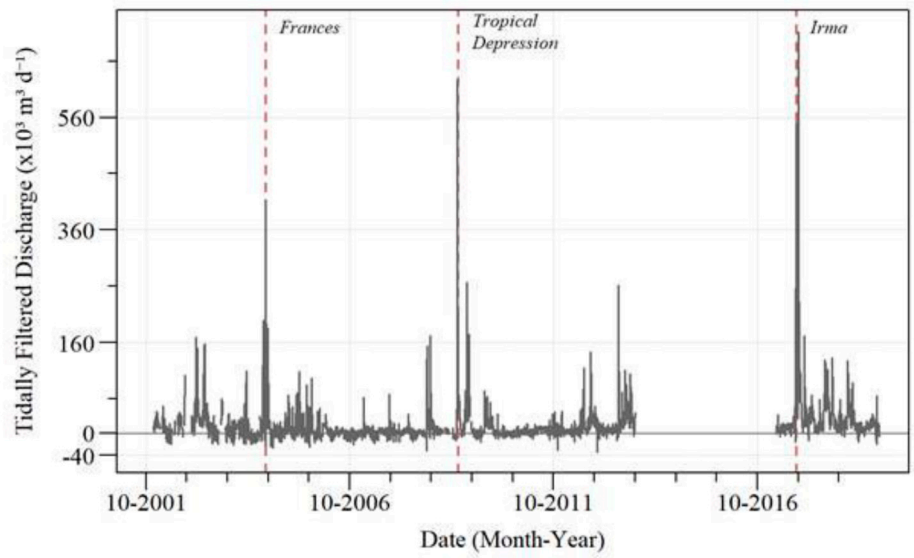

(a)

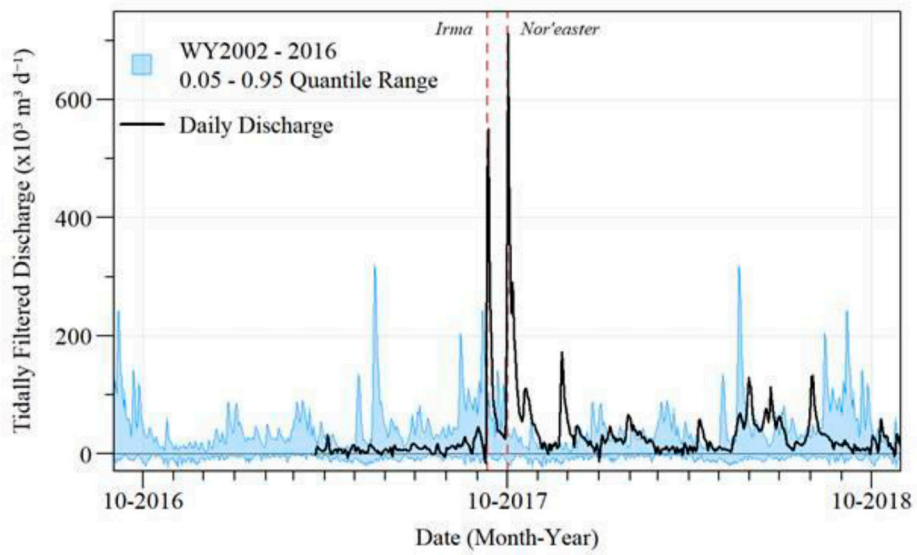

(b)

**Figure S1.** Creek (near Esponola, Florida) tidally filtered discharge (a) between 2001 and 2020 (2013–2016 gage data is unavailable) and (b) between October 2016 and October 2018 (unpublished data, United State Geologic Survey; <http://waterdata.usgs.dat/nwis/>). Hurricane Irma and the nor'easter after Hurricane Irma yielded some of the largest recorded discharge measurements of the past 20 years in Pellicer Creek.

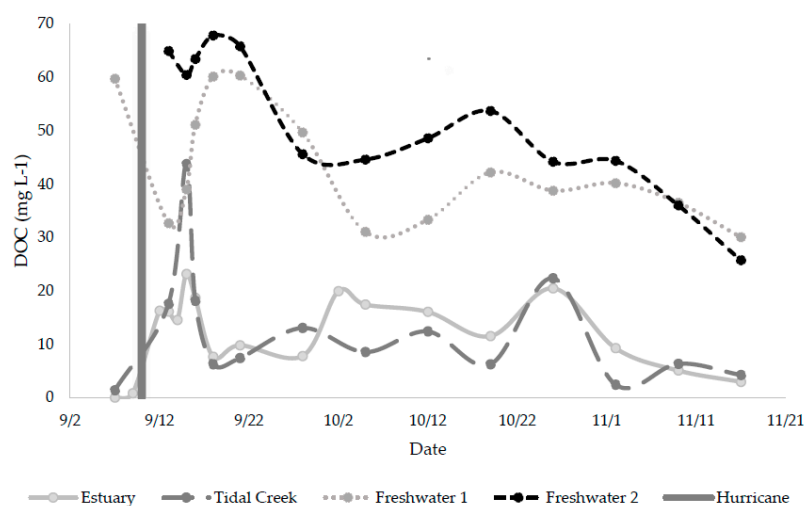

**Figure S2.** concentrations for dissolved organic carbon at four locations where water samples were collected across the study site (refer to Figure 1). Dark grey bar represents the period where the hurricane was directly passing through the area of study.

**Table S1.** Minimum detection limits for analytes discussed in this study.

| Analyte | MDL (mg L <sup>-1</sup> ) |
|---------|---------------------------|
| Cd      | 0.2                       |
| Cu      | 0.05                      |
| Fe      | 0.05                      |
| Mo      | 0.2                       |
| Pb      | 0.1                       |
| Zn      | 0.05                      |
| P       | 0.02                      |
